# Supplementary material
Source: PubMed Central journal article supplement (PMC6761035)
Supplement: NIHMS1536996-supplement-1.pdf [file NIHMS1536996-supplement-1.pdf]

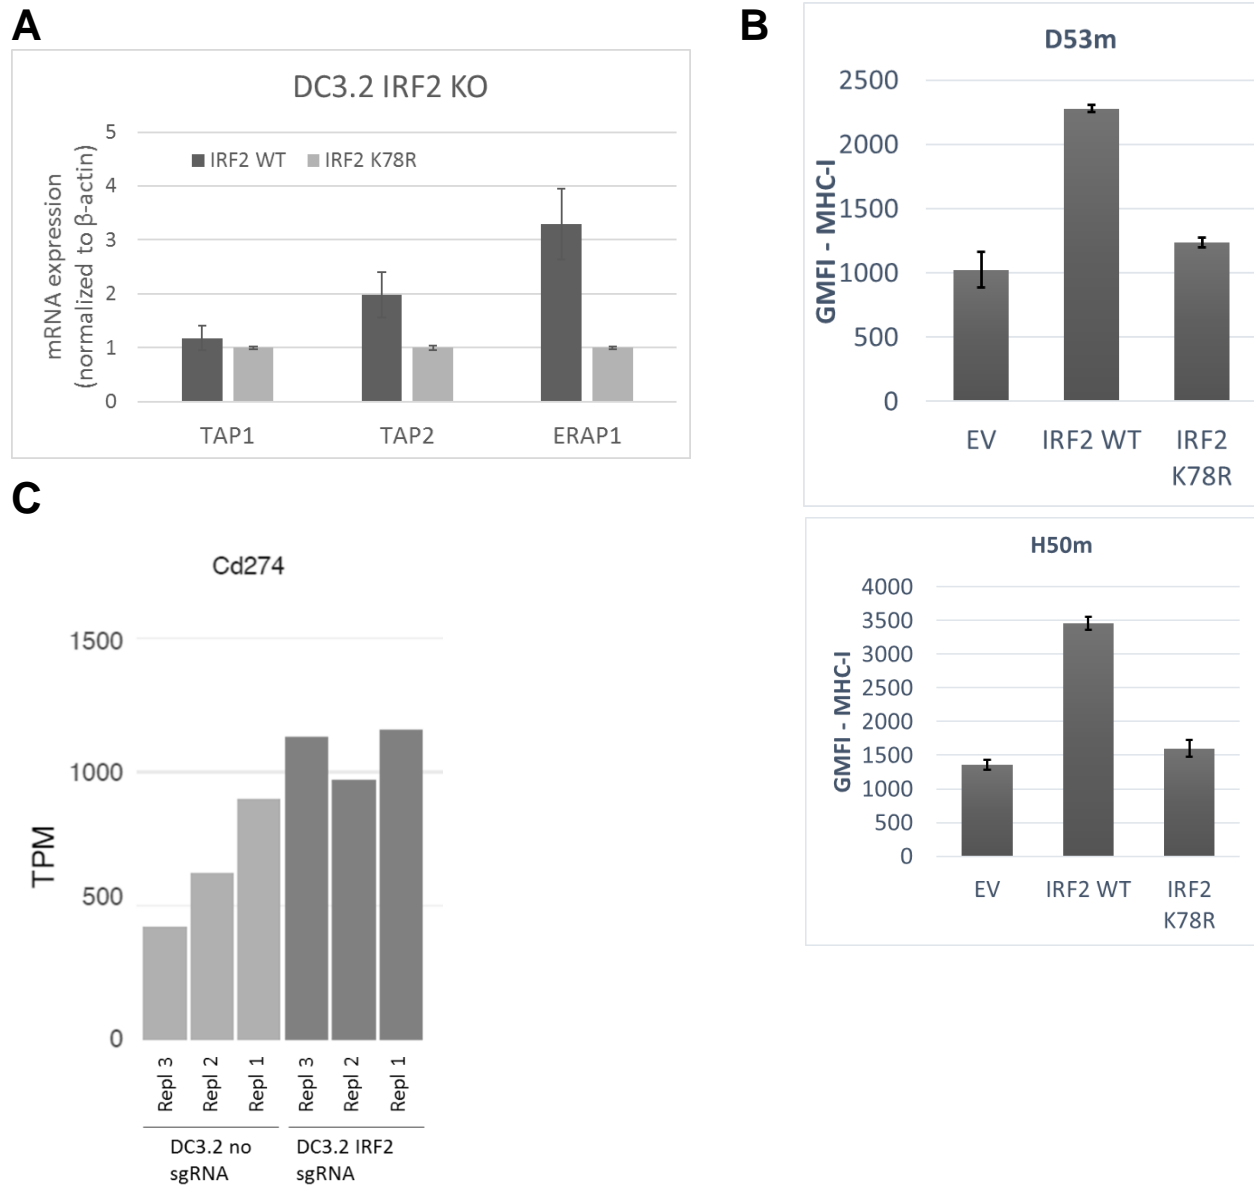

**Fig. S1.** Effects of IRF2 deficiency on antigen presentation machinery and PD-L1 expression

(A) TAP1, TAP2, or ERAP1 mRNA expression levels by qPCR in DC3.2 IRF2 KO 24hrs after overexpressing pCDH wild-type IRF2 (IRF2 WT) or mutant IRF2 (IRF2 K78R) relative to overexpressing pCDH IRF2 K78R; normalized to the mRNA expression of mouse  $\beta$ -actin in each sample ( $2^{-\Delta\Delta Ct}$ ). Values  $>1$  indicate higher expression than overexpressing IRF2 K78R and values  $<1$  indicate lower expression than overexpressing IRF2 K78R. Representative experiment shown; bars represent mean  $\pm$  SEM of mRNA expression of duplicate technical replicates; (B) Geometric MFI of surface MHC-I on D53m (top) or H50m (bottom) mouse sarcoma lines transduced with empty vector (EV), wild-type IRF2 (IRF2 WT), or mutant IRF2 (IRF2 K78R). Representative experiment shown; bars represent mean  $\pm$  SD of technical duplicates. (C) PD-L1 mRNA expression in the DC3.2 no sgRNA (“WT”) and DC3.2 IRF2 sgRNA (“IRF2 KO”) lines. Bars represent TPM from 3 independent RNA-seq replicates.

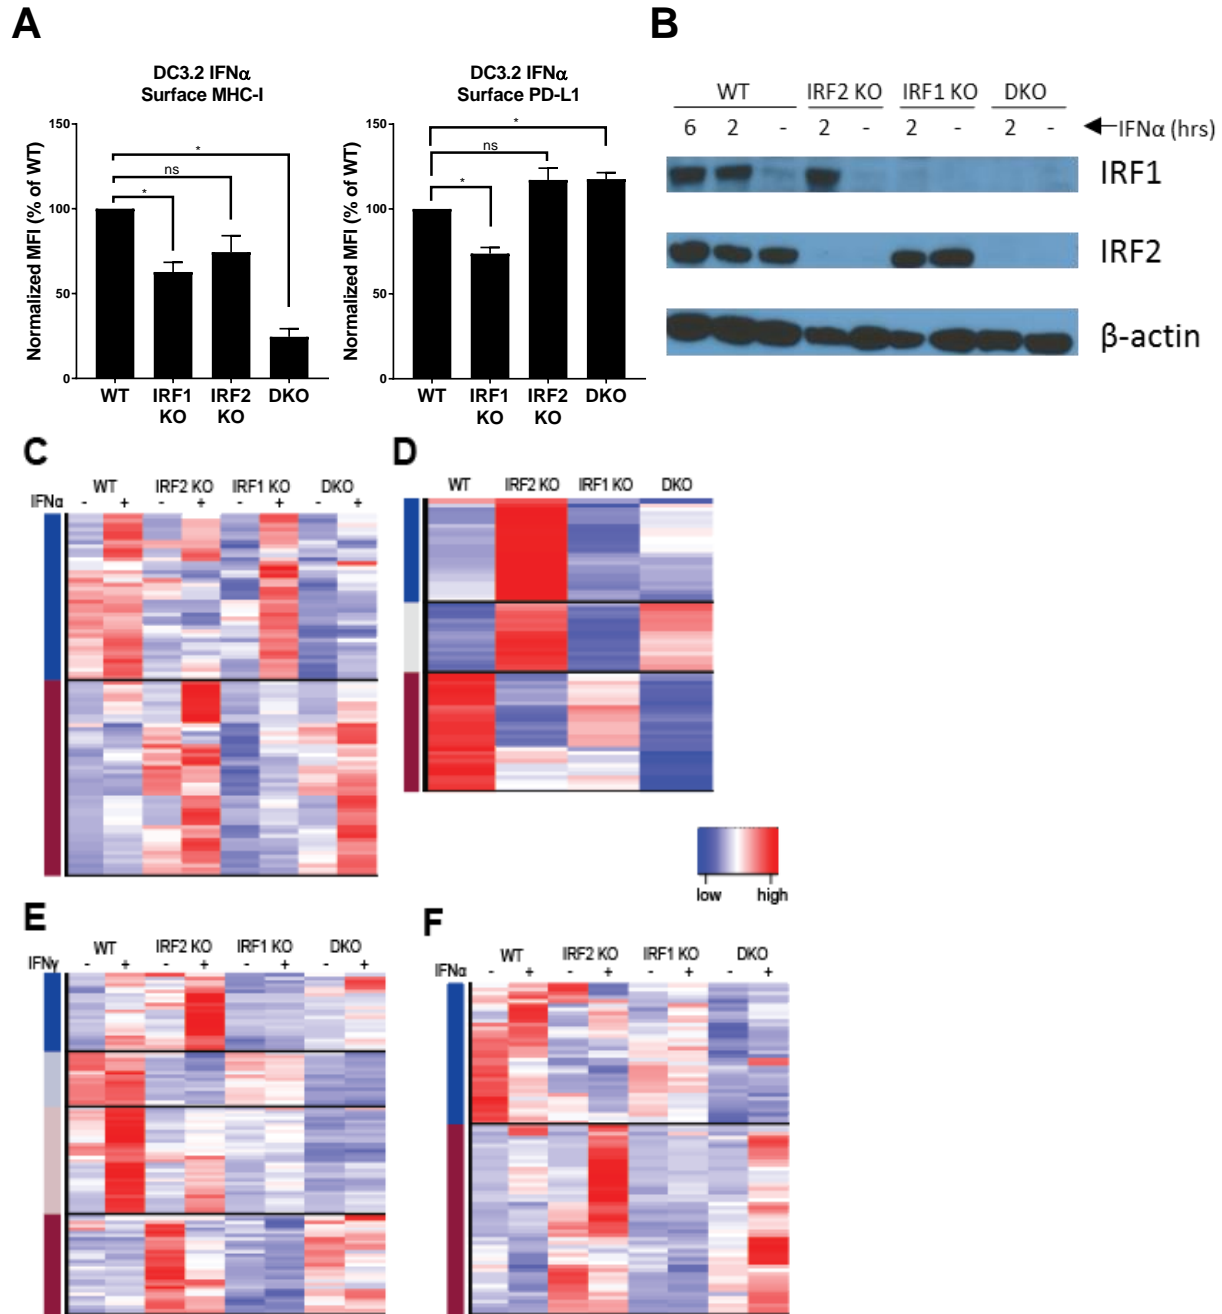

**Fig. S2.** Contributions of IRF1 vs. IRF2 after IFN stimulation

(A) Normalized MFI of surface MHC I and PD-L1 levels on DC3.2 stable knockout lines after overnight incubation with 5,000U/mL IFN $\alpha$ ; bars represent mean + SEM (N=3). Statistical analysis by two-tailed ratio paired t-tests; (B) Western blots of IRF1 and IRF2 (and  $\beta$ -actin as loading control) in DC3.2 KO lines in the absence or presence of 5,000U/mL IFN $\alpha$  for the durations indicated; (C) RNA-seq of DC3.2 no sgRNA (WT), IRF2 sgRNA (IRF2 KO), IRF1 sgRNA (IRF1 KO), or IRF1 + IRF2 sgRNAs (DKO) after stimulation for 2hrs with 5,000U/mL IFN $\alpha$  or media alone; (D-F) Second RNA-seq replicate of Fig. 5d, 5e, and Fig. S2c, respectively. (C-F) Genes from heatmaps listed in Table S1.

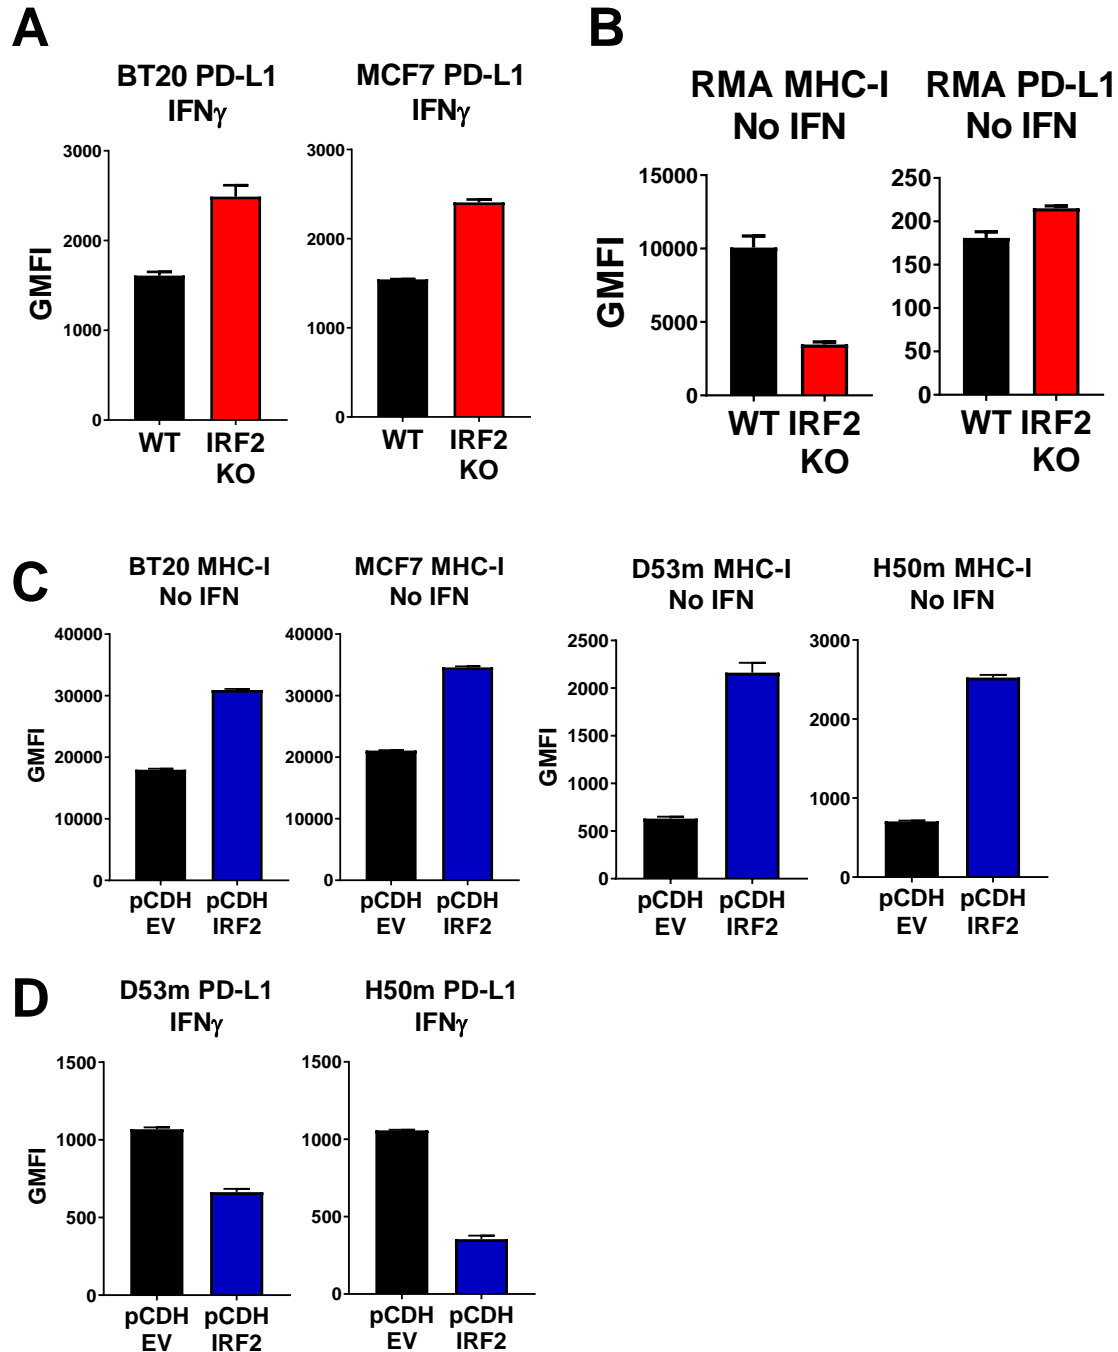

**Fig. S3.** Effects of IRF2 knockout or overexpression on other cell lines

(A-D) Geometric MFI of (A) surface PD-L1 on IFN $\gamma$ -stimulated BT20 and MCF7 knockout lines; (B) surface MHC-I (left) or surface PD-L1 (right) on unstimulated RMA lymphoma knockout lines; (C) surface MHC-I on (left) unstimulated BT20 and MCF7 lines or (right) unstimulated D53m and H50m mouse sarcoma lines overexpressing IRF2 (pCDH IRF2) or empty vector control (pCDH EV); and (D) surface PD-L1 on IFN $\gamma$ -stimulated D53m and H50m overexpression lines. Representative experiments shown, error bars represent staining of technical replicates.
